# Supplementary material
Source: bioRxiv or medRxiv preprint supplement (https://www.biorxiv.org/highwire/filestream/104166/field_highwire_adjunct_files/0/197525-1.pdf)
Supplement: Supplementary file [file 197525-1.pdf]

## **Biomechanics of the peafowl's crest reveals frequencies tuned to social displays**

Suzanne Amador Kane, Daniel Van Beveren, Roslyn Dakin

**Movie S1. Dynamic peacock courtship displays and robotic experiments.** When peacocks perform the train-rattling display, peahens are typically within 0.5-2 m away from the center of the bowl-shaped train as it vibrates. The position of the peahen relative to the wing shaking display is more variable but is often within 2 m. The peacock's wing feather tips trace a circular orbit while the wingplane remains in the same orientation during the wing-shaking display. This example clip is slowed down by a factor of 10 times. We used a wing-shaking robot to study the effect of wing-shaking on the nearby crest feathers, also slowed down by 10 times. The last clip in this video shows the response of a peafowl crest impacted by an air vortex that has been rendered visible using special effects smoke and slowed down by 20 times.

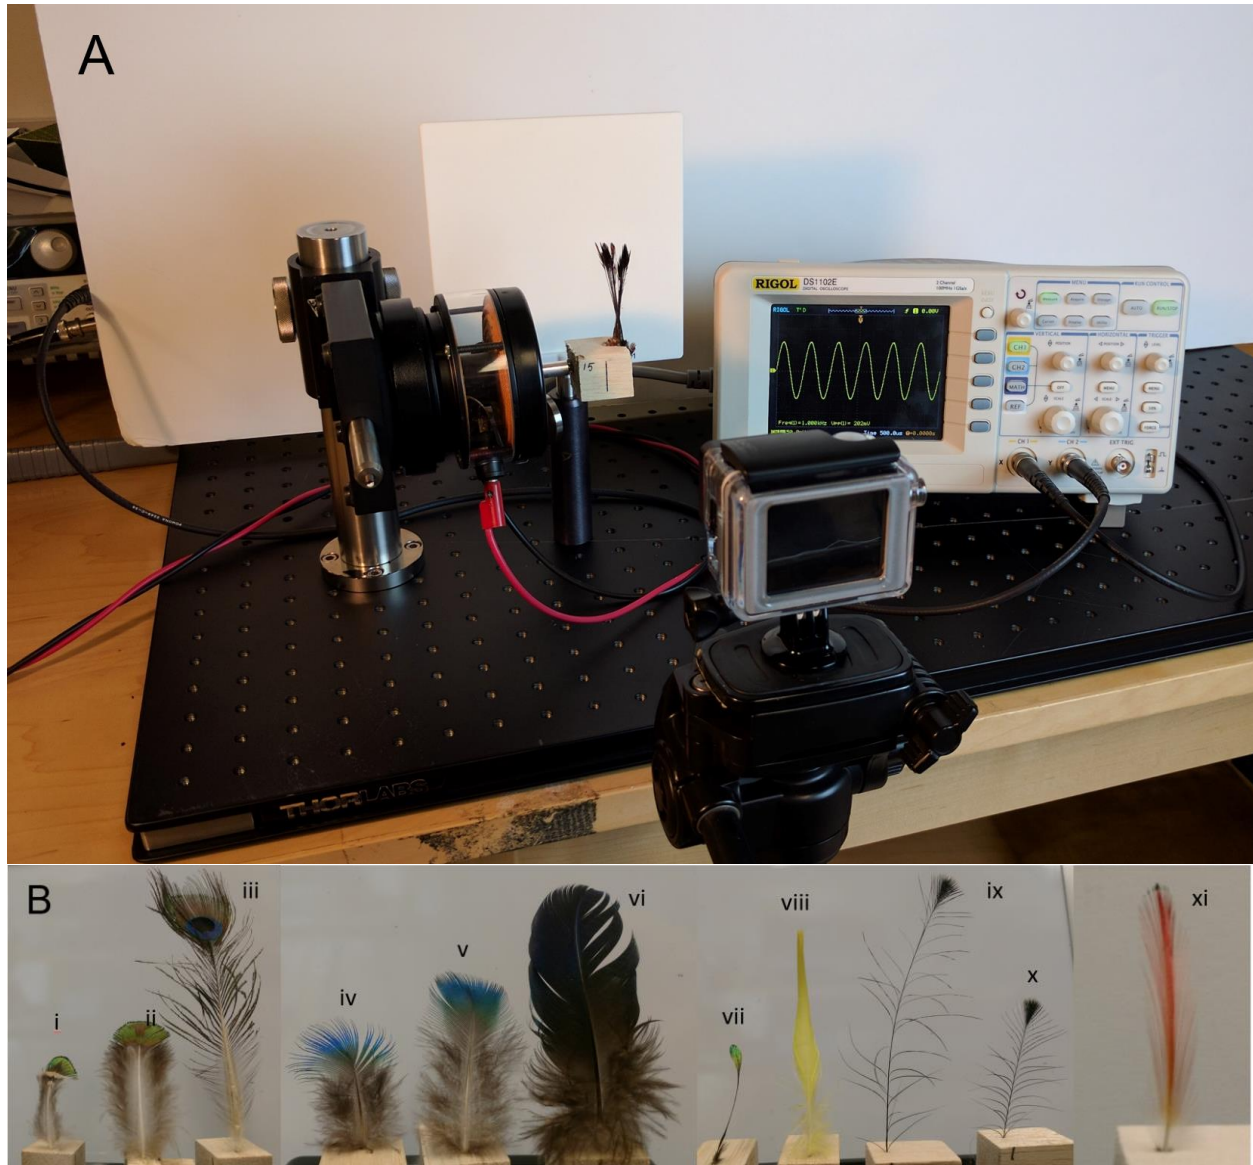

**Fig. S1.** (A) Apparatus for measuring the vibrational response of peafowl feather crests. Crests were first glued onto balsa wood blocks, which were then mounted on a mechanical shaker driven by a function generator that produced a sine wave output with a linear ramp in the frequency of shaking. The resulting motions of the crest flags and the shaker were measured using high-speed video. (B) Feather samples from Table S1 measured for comparison with peafowl crest vibrational resonant frequencies (not shown to scale): (i), (ii) peacock mantle feathers; (iii) short peacock eyespot feather; (iv), (v) peafowl body semiplumes; (vi) peacock wing covert; (vii) Himalayan monal crest feather; (viii) yellow crested cockatoo crest feather; (ix), (x) Victoria crowned pigeon crest feathers; (xi) golden pheasant crest feather.

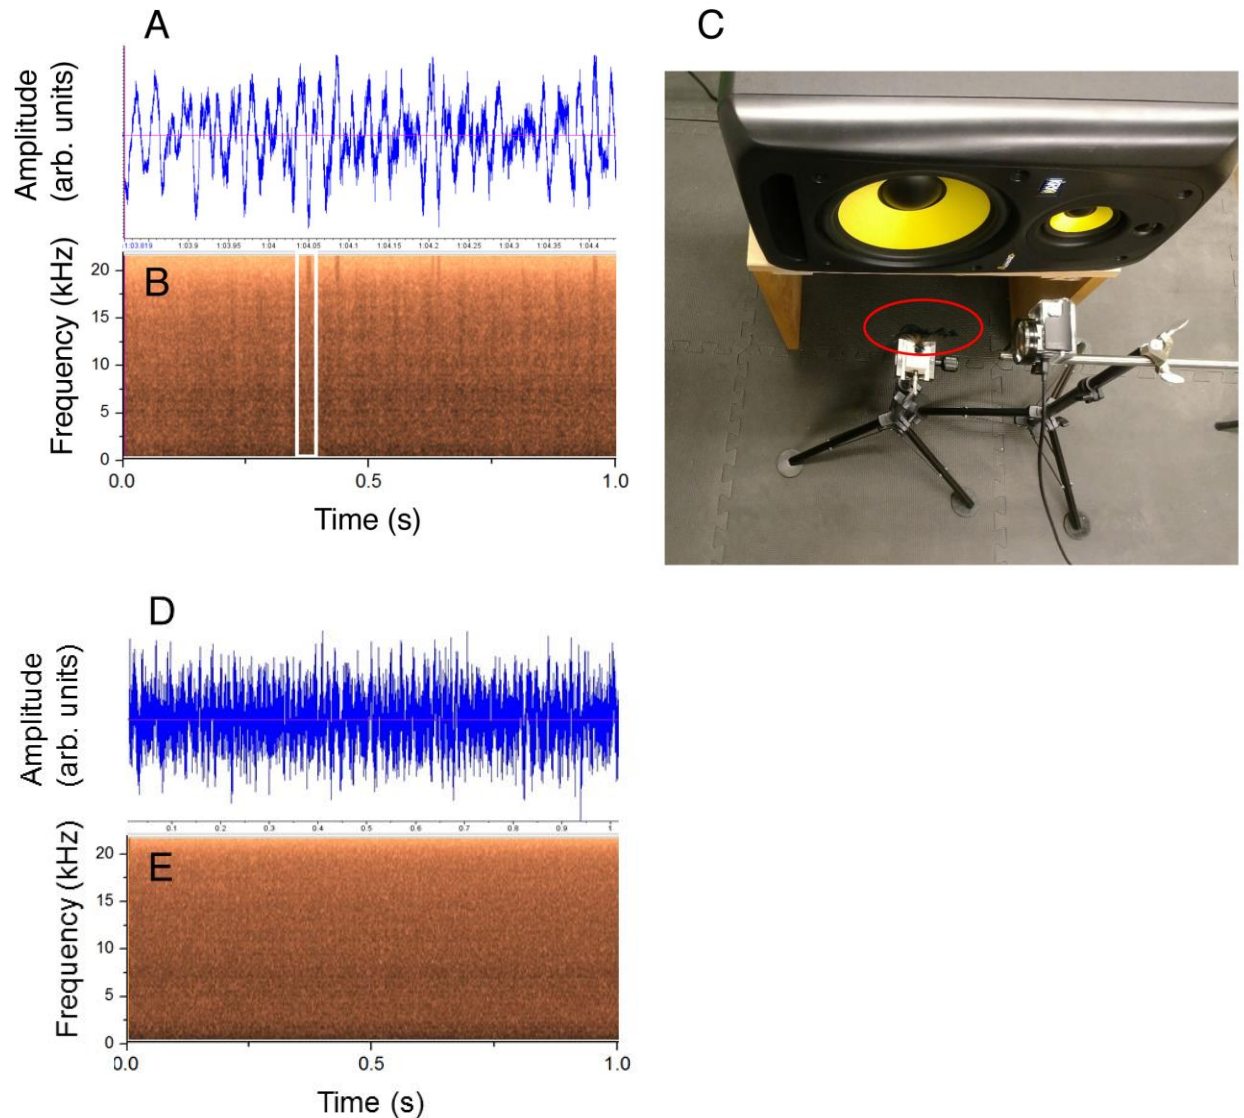

**Fig. S2.** Example audio and apparatus used for measuring the vibrational response of peafowl feather crests during audio playback of peacock train-rattling mechanical sounds. (A-B) An example waveform and spectrogram for one of the playback stimulus tracks of peacock train-rattling sounds. The waveform (A) and spectrogram (B) were generated from a re-recording made of the playback stimulus, to ensure that features of the playback stimulus matched those of the original recording from Dakin et al. (2016). The white box in (B) highlights a single rattle note in the train-rattling spectrogram. (C) Playback apparatus viewed from above. The crest sample (red ellipse) was exposed to the flow near-field of a loudspeaker (top) that played back peacock train-rattling sounds. The resulting motions of the crest flags were measured using a high-speed video camera (located to the right of the ellipse). (D-E) Waveform and spectrogram of the white noise control played back through the same audio system used for train-rattling playbacks. This illustrates the resemblance between the broad-band frequency spectrum of the white noise control (E) and the rattle notes (B). However, the white noise control lacks modulation at the low frequencies characteristic of displays.

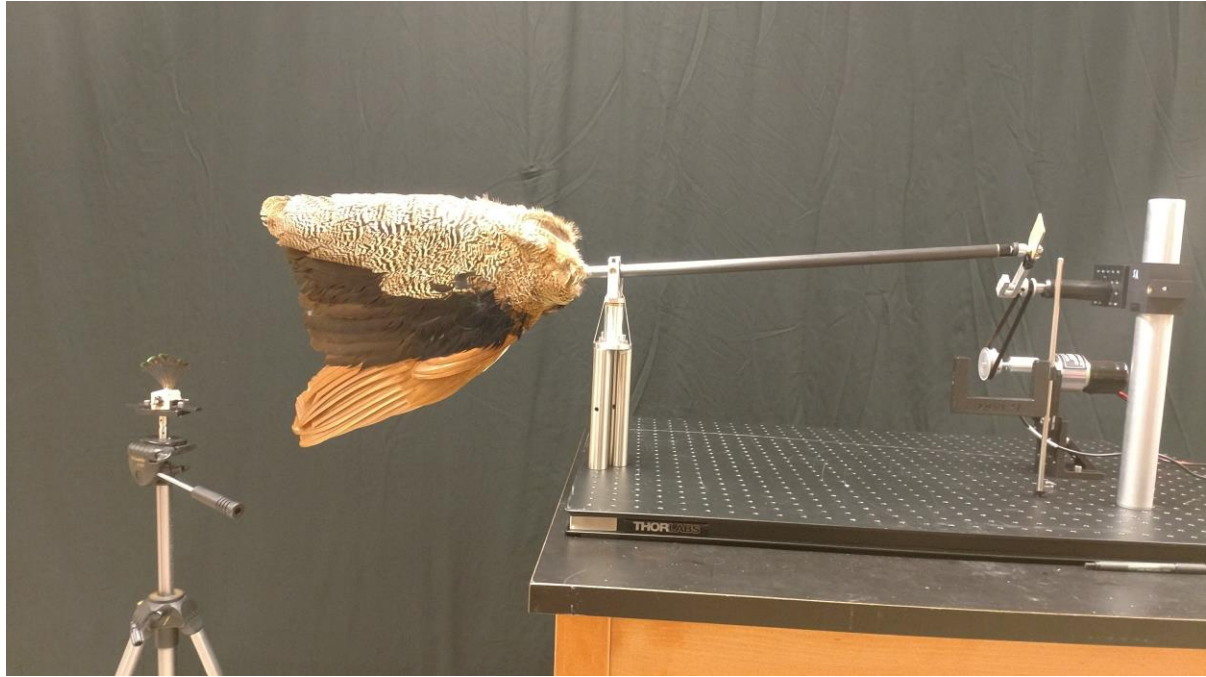

**Fig. S3.** Peacock wing-shaking displays were simulated using a peacock wing mounted on a carbon fiber rod. The rod was rotated at approximately 5 Hz (a typical wing-shaking frequency) about a clevis joint located at the wing's shoulder joint, ensuring that the plane of the wing's surface remained vertical while the tips circumscribed a 14 cm diameter circle. Peahen crests were positioned in the region of maximum airflow at distances  $\leq 90$  cm (50 cm shown here) from the wingtips. The resulting crest motion was filmed using high-speed video.

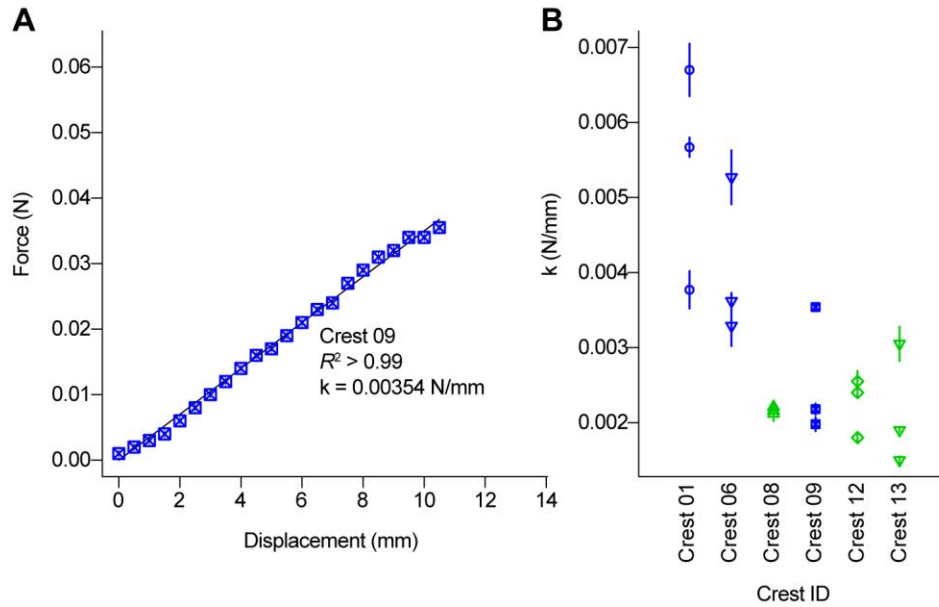

**Fig. S4. Bending spring constant,  $k$ , of peafowl crests.** Force-displacement trials were performed three times each for  $n = 3$  male and  $n = 3$  female crests, respectively. The bending spring constant,  $k$ , was calculated from the slope of linear model fits to the resulting force-displacement data from each trial. The example in (A) shows data from a single trial on peacock Crest 09 to illustrate the linearity of the response, with symbols scaled to span y-axis measurement error. (B) Values of  $k$  from each of three trials on the total  $n = 6$  crests. Each crest sample is denoted by a different symbol-color combination, following Figs. 2-3 of the main text, and ordered left to right by decreasing mean  $k$  value. Blue data are male (peacock) crests and green data are female (peahen) crests.

**Table S1.** Individual feathers used in the vibrational resonant measurements for comparison with values shown in Fig. 3 for peafowl crests.

| Species                 | Feather type           | Rachis length (cm)<br>(+/- 0.05 cm 95% CI) |
|-------------------------|------------------------|--------------------------------------------|
| Indian peafowl male     | Body contour semiplume | 3.94                                       |
| Indian peafowl male     | Body contour semiplume | 5.95                                       |
| Indian peafowl male     | Wing covert            | 10.67                                      |
| Indian peafowl male     | mantle                 | 5.15                                       |
| Indian peafowl male     | mantle                 | 7.00                                       |
| Indian peafowl male     | train eyespot          | 11.50                                      |
| Victoria crowned pigeon | crest                  | 6.30                                       |
| Victoria crowned pigeon | crest                  | 12.50                                      |
| Himalayan monal         | crest                  | 5.50                                       |
| Golden pheasant         | crest                  | 5.00                                       |
| Yellow-crested cockatoo | crest                  | 10.00                                      |

**Table S2.** Sound pressure levels (SPL) of avian wingbeats during flight and wing-beating displays measured in previous studies.

| Bird species                                                         | SPL (dB)                                                                 | Distance (m) | Reference                                                                                                                                                                             |
|----------------------------------------------------------------------|--------------------------------------------------------------------------|--------------|---------------------------------------------------------------------------------------------------------------------------------------------------------------------------------------|
| Eastern phoebes,<br><i>Sayornis phoebe</i>                           | 64-66 dB SPL at 1 kHz                                                    | 1.2 m        | Fournier, J.P., Dawson, J.W., Mikhail, A., & Yack, J.E. (2013). If a bird flies in the forest, does an insect hear it? <i>Biology letters</i> 9(5): 20130319.                         |
| Black-capped chickadees,<br><i>Poecile atricapillus</i>              | 54-60 dB SPL at 25 kHz                                                   | 1.2 m        | Fournier, J.P., Dawson, J.W., Mikhail, A., & Yack, J.E. (2013). If a bird flies in the forest, does an insect hear it? <i>Biology letters</i> 9(5): 20130319.                         |
| Crested pigeons,<br><i>Ocyphaps lophotes</i>                         | ≤ 67.6 dB SPL                                                            | 1.0 m        | Hingee, M. & Magrath, R.D. (2009) Flights of fear: a mechanical wing whistle sounds the alarm in a flocking bird. <i>Proceedings of the Royal Society of London B</i> : rspb20091110. |
| Ruffed grouse,<br><i>Bonasa umbellus</i><br>(a wing-beating display) | 66.2 dB SPL, bandwidth 300 Hz to 8 kHz, frequency weighting not reported | 1.0 m        | Garcia, M., Charrier, I., & Iwaniuk, A.N. (2012) Directionality of the drumming display of the ruffed grouse. <i>The Condor</i> 114(3): 500-506.                                      |



**Table S3.** Wingflap frequencies of adult peacocks during level and ascending flight.

| Source                                                                                                                               | Number of individuals | Wingflap frequency (Hz) |
|--------------------------------------------------------------------------------------------------------------------------------------|-----------------------|-------------------------|
| <a href="https://www.youtube.com/watch?v=HvY_1wFSFsQ">https://www.youtube.com/watch?v=HvY_1wFSFsQ</a><br>accessed September 28, 2017 | 1                     | 4.92                    |
| <a href="https://www.youtube.com/watch?v=7gxQwm4MWns">https://www.youtube.com/watch?v=7gxQwm4MWns</a><br>accessed September 28, 2017 | 1                     | 4.16                    |
| <a href="https://www.youtube.com/watch?v=U55iMliI_k0">https://www.youtube.com/watch?v=U55iMliI_k0</a><br>accessed September 28, 2017 | 1                     | 6.43                    |
| <a href="https://www.youtube.com/watch?v=kZe0jLkeMuk">https://www.youtube.com/watch?v=kZe0jLkeMuk</a><br>accessed September 28, 2017 | 1                     | 4.42                    |
| <a href="https://www.youtube.com/watch?v=FrMQs7OwWC8">https://www.youtube.com/watch?v=FrMQs7OwWC8</a><br>accessed September 28, 2017 | 3                     | 6.36<br>6.00<br>5.55    |
| <a href="https://www.youtube.com/watch?v=A5xSgaXDkTY">https://www.youtube.com/watch?v=A5xSgaXDkTY</a><br>accessed September 28, 2017 | 2                     | 5.81<br>6.15            |



**Table S4.** Species in which both sexes have crests of flexible feathers and the male also performs a shaking display. There are many bird species wherein both sexes have a flexible feather crest. To understand the taxonomic breadth of birds that have shaking displays in addition to the crest, we used natural history resources including photos, videos and descriptive accounts of appearance and behavior. We documented at least 35 species across 10 different orders in which the females exhibit flexible feather crests and the males are known to perform shaking displays.

| Order             | Species                             | Common name                |
|-------------------|-------------------------------------|----------------------------|
| Accipitriformes   | <i>Sagittarius serpentarius</i>     | Secretary bird             |
| Cariamiformes     | <i>Cariama cristata</i>             | Crested cariana            |
| Columbiformes     | <i>Geophaps plumifera</i>           | Spinifex pigeon            |
|                   | <i>Goura cristata</i>               | Western crowned pigeon     |
|                   | <i>Goura scheepmakeri</i>           | Southern crowned pigeon    |
|                   | <i>Goura victoria</i>               | Victoria crowned pigeon    |
|                   | <i>Ocyphaps lophotes</i>            | Crested pigeon             |
| Galliformes       | <i>Afropavo congensis</i>           | Congo peafowl              |
|                   | <i>Argusianus argus</i>             | Great argus                |
|                   | <i>Colinus cristatus</i>            | Crested bobwhite           |
|                   | <i>Leipoa ocellata</i>              | Malleefowl                 |
|                   | <i>Lophophorus impejanus</i>        | Himalayan monal            |
|                   | <i>Lophura ignita</i>               | Crested fireback           |
|                   | <i>Lophura leucomelanos</i>         | Kalij pheasant             |
|                   | <i>Pavo cristatus</i>               | Indian peafowl             |
|                   | <i>Pavo muticus</i>                 | Green peafowl              |
|                   | <i>Polyplectron bicalcaratum</i>    | Gray peacock pheasant      |
|                   | <i>Polyplectron malacense</i>       | Malayan peacock pheasant   |
|                   | <i>Polyplectron napoleonis</i>      | Palawan peacock pheasant   |
|                   | <i>Polyplectron schleiermacheri</i> | Bornean peacock pheasant   |
|                   | <i>Rheinardia ocellata</i>          | Crested argus              |
|                   | <i>Tetrao urogallus</i>             | Western capercaillie       |
| Gruiformes        | <i>Balearica pavonina</i>           | Black crowned crane        |
|                   | <i>Balearica regulorum</i>          | Gray crowned crane         |
| Opisthocomiformes | <i>Opisthocomus hoazin</i>          | Hoatzin                    |
| Passeriformes     | <i>Baeolophus bicolor</i>           | Tufted titmouse            |
|                   | <i>Cardinalis cardinalis</i>        | Northern cardinal          |
|                   | <i>Onychorhynchus coronatus</i>     | Royal flycatcher           |
|                   | <i>Prionops plumatus</i>            | White-crested helmetshrike |
|                   | <i>Pycnonotus jocosus</i>           | Red-whiskered bulbul       |
|                   | <i>Rupicola peruvianus</i>          | Andean cock-of-the-rock    |
| Pelicaniformes    | <i>Phalacrocorax auritus</i>        | Double-crested cormorant   |
|                   | <i>Phalacrocorax carbo</i>          | Great cormorant            |
| Suliformes        | <i>Anhinga anhinga</i>              | Anhinga                    |
| Tinamiformes      | <i>Eudromia elegans</i>             | Elegant crested tinamou    |
